# Supplementary material for: Types of Physical Activity in Nonalcoholic Fatty Liver Disease and All-Cause and Cardiovascular Mortality
Source: MDPI journal article supplement (doi:10.3390/jcm12051923), 2023-02-28
Supplement: s1 [file s1]

# Supplementary Materials

**Table S1.** Multivariable Hazards Ratio for All-Cause Mortality based on the Meeting Physical Activity Guideline among Individuals with NAFLD defined by US Fatty Liver Index.

|                                          | Age, sex-adjusted model |         | Multivariable model 1 |         | Multivariable model 2 |         |
|------------------------------------------|-------------------------|---------|-----------------------|---------|-----------------------|---------|
|                                          | HR (95% CI)             | p-value | HR (95% CI)           | p-value | HR (95% CI)           | p-value |
| Total physical activity                  |                         |         |                       |         |                       |         |
| <150 (min/wk)                            | 1                       |         | 1                     |         | 1                     |         |
| ≥150 (min/wk)                            | 0.63 (0.47–0.84)        | 0.002   | 0.70 (0.52–0.95)      | 0.025   | 0.72 (0.53–0.97)      | 0.034   |
| Leisure-time physical activity           |                         |         |                       |         |                       |         |
| <150 (min/wk)                            | 1                       |         | 1                     |         | 1                     |         |
| ≥150 (min/wk)                            | 0.45 (0.31–0.63)        | <0.001  | 0.48 (0.33–0.68)      | <0.001  | 0.48 (0.34–0.69)      | <0.001  |
| Occupation-related physical activity     |                         |         |                       |         |                       |         |
| <150 (min/wk)                            | 1                       |         | 1                     |         | 1                     |         |
| ≥150 (min/wk)                            | 0.86 (0.62–1.19)        | 0.358   | 0.95 (0.69–1.32)      | 0.773   | 0.97 (0.70–1.36)      | 0.863   |
| Transportation-related physical activity |                         |         |                       |         |                       |         |
| <150 (min/wk)                            | 1                       |         | 1                     |         | 1                     |         |
| ≥150 (min/wk)                            | 0.65 (0.42–1.04)        | 0.071   | 0.68 (0.40–1.15)      | 0.148   | 0.70 (0.41–1.17)      | 0.167   |

The multivariable model 1 was adjusted for age, sex, race/ethnicity, education level, marital status, economic status, smoking status, hypertension, diabetes, total cholesterol, total calorie intake, caffeine consumption, and alcohol consumption using appropriate sampling weights. The multivariable model 2 was adjusted for waist circumference in addition to model 1 using appropriate sampling weights. Abbreviations: NAFLD, nonalcoholic fatty liver disease; HR, hazard ratio; CI, confidence interval.

**Table S2.** Multivariable Hazards Ratio for All-Cause Mortality based on the Amount of Physical Activity among Individuals with NAFLD defined by US Fatty Liver Index.

|                                                   | Age, sex-adjusted model |          | Multivariable model 1 |          | Multivariable model 2 |          |
|---------------------------------------------------|-------------------------|----------|-----------------------|----------|-----------------------|----------|
|                                                   | HR (95% CI)             | p-value  | HR (95% CI)           | p-value  | HR (95% CI)           | p-value  |
| Total physical activity (min/wk)                  |                         |          |                       |          |                       |          |
| 0                                                 | 1                       | <0.001 * | 1                     | 0.006 *  | 1                     | 0.009 *  |
| 1–149                                             | 0.56 (0.41–0.77)        | <0.001   | 0.64 (0.46–0.90)      | 0.010    | 0.66 (0.47–0.90)      | 0.011    |
| 150–299                                           | 0.50 (0.29–0.87)        | 0.015    | 0.58 (0.33–1.03)      | 0.061    | 0.59 (0.34–1.04)      | 0.066    |
| 300–                                              | 0.56 (0.42–0.74)        | <0.001   | 0.64 (0.47–0.86)      | 0.003    | 0.64 (0.49–0.88)      | 0.006    |
| Leisure-time physical activity (min/wk)           |                         |          |                       |          |                       |          |
| 0                                                 | 1                       | <0.001 * | 1                     | <0.001 * | 1                     | <0.001 * |
| 1–149                                             | 0.54 (0.37–0.81)        | 0.003    | 0.65 (0.43–0.99)      | 0.045    | 0.65 (0.44–1.01)      | 0.055    |
| 150–299                                           | 0.36 (0.20–0.65)        | 0.001    | 0.37 (0.21–0.70)      | 0.002    | 0.39 (0.21–0.70)      | 0.002    |
| 300–                                              | 0.45 (0.33–0.63)        | <0.001   | 0.51 (0.36–0.72)      | <0.001   | 0.52 (0.36–0.73)      | <0.001   |
| Occupation-related physical activity (min/wk)     |                         |          |                       |          |                       |          |
| 0                                                 | 1                       | 0.204 *  | 1                     | 0.572 *  | 1                     | 0.655 *  |
| 1–149                                             | 0.70 (0.41–1.17)        | 0.171    | 0.80 (0.48–1.33)      | 0.376    | 0.79 (0.46–1.33)      | 0.365    |
| 150–299                                           | 0.84 (0.44–1.61)        | 0.590    | 1.01 (0.50–2.03)      | 0.986    | 1.03 (0.51–2.06)      | 0.943    |
| 300–                                              | 0.83 (0.61–1.13)        | 0.228    | 0.92 (0.68–1.23)      | 0.555    | 0.93 (0.69–1.26)      | 0.641    |
| Transportation-related physical activity (min/wk) |                         |          |                       |          |                       |          |
| 0                                                 | 1                       | 0.058 *  | 1                     | 0.155 *  | 1                     | 0.177 *  |
| 1–149                                             | 0.76 (0.47–1.22)        | 0.252    | 0.85 (0.51–1.40)      | 0.512    | 0.86 (0.52–1.41)      | 0.542    |
| 150–299                                           | 0.71 (0.40–1.28)        | 0.256    | 0.72 (0.38–1.34)      | 0.296    | 0.73 (0.40–1.35)      | 0.312    |
| 300–                                              | 0.60 (0.27–1.31)        | 0.192    | 0.63 (0.26–1.51)      | 0.295    | 0.65 (0.27–1.56)      | 0.326    |

The multivariable model 1 was adjusted for age, sex, race/ethnicity, education level, marital status, economic status, smoking status, hypertension, diabetes, total cholesterol, total calorie intake, caffeine consumption, and alcohol consumption using appropriate sampling weights. The multivariable model 2 was adjusted for waist circumference in addition to model 1 using appropriate sampling weights. Abbreviations: NAFLD, nonalcoholic fatty liver disease; HR, hazard ratio; CI, confidence interval. \* p-values were analyzed using the test of the trend of hazards.

**Table S3.** Multivariable Hazards Ratio for All-Cause Mortality based on the Meeting Physical Activity Guidelines among Individuals with NAFLD defined by Hepatic Steatosis Index.

|                         | Age, sex-adjusted model |                 | Multivariable model 1 |                 | Multivariable model 2 |                 |
|-------------------------|-------------------------|-----------------|-----------------------|-----------------|-----------------------|-----------------|
|                         | HR (95% CI)             | <i>p</i> -value | HR (95% CI)           | <i>p</i> -value | HR (95% CI)           | <i>p</i> -value |
| Total physical activity |                         |                 |                       |                 |                       |                 |
| <150 (min/wk)           | 1                       |                 | 1                     |                 | 1                     |                 |
| ≥150 (min/wk)           | 0.63 (0.53–0.76)        | <0.001          | 0.75 (0.61–0.91)      | 0.005           | 0.76 (0.62–0.93)      | 0.008           |
| Obese NAFLD             | 1.28 (1.09–1.51)        | 0.004           | 1.19 (1.00–1.42)      | 0.052           | 1.22 (1.01–1.48)      | 0.044           |
| Total physical activity |                         |                 |                       |                 |                       |                 |
| Total physical activity |                         |                 |                       |                 |                       |                 |
| <150 (min/wk)           | 1                       |                 | 1                     |                 | 1                     |                 |
| ≥150 (min/wk)           | 0.66 (0.55–0.80)        | <0.001          | 0.74 (0.60–0.90)      | 0.003           | 0.75 (0.62–0.92)      | 0.006           |
| Diabetic NAFLD          | 1.59 (1.36–1.86)        | <0.001          | 1.50 (1.25–1.80)      | <0.001          | 1.54 (1.26–1.89)      | <0.001          |

The multivariable model 1 was adjusted for age, sex, race/ethnicity, education level, married status, economic status, smoking status, hypertension, diabetes, total cholesterol, total calorie intake, caffeine consumption, and alcohol consumption using appropriate sampling weights. The multivariable model 2 was adjusted for waist circumference in addition to model 1 using appropriate sampling weights. Abbreviations: NAFLD, nonalcoholic fatty liver disease; HR, hazard ratio; CI, confidence interval.

**Table S4.** Multivariable Hazards Ratio for All-Cause Mortality based on the Meeting Physical Activity Guidelines among Individuals with NAFLD defined by Hepatic Steatosis Index.

|                                          | Age, sex-adjusted model |                 | Multivariable model 1 |                 | Multivariable model 2 |                 |
|------------------------------------------|-------------------------|-----------------|-----------------------|-----------------|-----------------------|-----------------|
|                                          | HR (95% CI)             | <i>p</i> -value | HR (95% CI)           | <i>p</i> -value | HR (95% CI)           | <i>p</i> -value |
| Total physical activity                  |                         |                 |                       |                 |                       |                 |
| <150 (min/wk)                            | 1                       |                 | 1                     |                 | 1                     |                 |
| ≥150 (min/wk)                            | 0.63 (0.53–0.76)        | <0.001          | 0.74 (0.61–0.91)      | 0.004           | 0.75 (0.62–0.92)      | 0.006           |
| Advanced fibrosis                        | 1.63 (1.35–1.97)        | <0.001          | 1.51 (1.21–1.89)      | <0.001          | 1.47 (1.14–1.88)      | 0.003           |
| Leisure-time physical activity           |                         |                 |                       |                 |                       |                 |
| <150 (min/wk)                            | 1                       |                 | 1                     |                 | 1                     |                 |
| ≥150 (min/wk)                            | 0.66 (0.52–0.85)        | 0.001           | 0.77 (0.59–0.99)      | 0.045           | 0.76 (0.59–0.99)      | 0.039           |
| Advanced fibrosis                        | 1.64 (1.36–1.99)        | <0.001          | 1.51 (1.21–1.89)      | <0.001          | 1.46 (1.14–1.88)      | 0.003           |
| Occupation-related physical activity     |                         |                 |                       |                 |                       |                 |
| <150 (min/wk)                            | 1                       |                 | 1                     |                 | 1                     |                 |
| ≥150 (min/wk)                            | 0.79 (0.65–0.96)        | 0.018           | 0.90 (0.73–1.11)      | 0.342           | 0.93 (0.75–1.15)      | 0.480           |
| Advanced fibrosis                        | 1.64 (1.36–1.99)        | <0.001          | 1.52 (1.22–1.90)      | <0.001          | 1.47 (1.15–1.88)      | 0.003           |
| Transportation-related physical activity |                         |                 |                       |                 |                       |                 |
| <150 (min/wk)                            | 1                       |                 | 1                     |                 | 1                     |                 |
| ≥150 (min/wk)                            | 0.63 (0.46–0.86)        | 0.005           | 0.62 (0.44–0.86)      | 0.005           | 0.63 (0.45–0.88)      | 0.007           |
| Advanced fibrosis                        | 1.66 (1.37–2.00)        | <0.001          | 1.53 (1.22–1.90)      | <0.001          | 1.47 (1.15–1.89)      | 0.003           |

The multivariable model 1 was adjusted for age, sex, race/ethnicity, education level, married status, economic status, smoking status, hypertension, diabetes, total cholesterol, total calorie intake, caffeine consumption, and alcohol consumption using appropriate sampling weights. The multivariable model 2 was adjusted for waist circumference in addition to model 1 using appropriate sampling weights. Abbreviations: NAFLD, nonalcoholic fatty liver disease; HR, hazard ratio; CI, confidence interval.

**Table S5.** Multivariable Hazards Ratio for All-Cause Mortality based on the Meeting Physical Activity Guidelines among Individuals with Advanced Fibrosis.

|                                          | Age, sex-adjusted model |         | Multivariable model 1 |         | Multivariable model 2 |         |
|------------------------------------------|-------------------------|---------|-----------------------|---------|-----------------------|---------|
|                                          | HR (95% CI)             | p-value | HR (95% CI)           | p-value | HR (95% CI)           | p-value |
| Total physical activity                  |                         |         |                       |         |                       |         |
| <150 (min/wk)                            | 1                       |         | 1                     |         | 1                     |         |
| ≥150 (min/wk)                            | 0.43 (0.31–0.58)        | <0.001  | 0.52 (0.38–0.71)      | <0.001  | 0.53 (0.37–0.73)      | <0.001  |
| Leisure-time physical activity           |                         |         |                       |         |                       |         |
| <150 (min/wk)                            | 1                       |         | 1                     |         | 1                     |         |
| ≥150 (min/wk)                            | 0.51 (0.38–0.70)        | <0.001  | 0.65 (0.47–0.90)      | 0.009   | 0.63 (0.45–0.88)      | 0.007   |
| Occupation-related physical activity     |                         |         |                       |         |                       |         |
| <150 (min/wk)                            | 1                       |         | 1                     |         | 1                     |         |
| ≥150 (min/wk)                            | 0.53 (0.34–0.82)        | 0.005   | 0.64 (0.40–1.01)      | 0.054   | 0.66 (0.42–1.04)      | 0.013   |
| Transportation-related physical activity |                         |         |                       |         |                       |         |
| <150 (min/wk)                            | 1                       |         | 1                     |         | 1                     |         |
| ≥150 (min/wk)                            | 0.46 (0.26–0.81)        | 0.008   | 0.45 (0.24–0.84)      | 0.013   | 0.45 (0.24–0.85)      | 0.014   |

The multivariable model 1 was adjusted for age, sex, race/ethnicity, education level, married status, economic status, smoking status, hypertension, diabetes, total cholesterol, total calorie intake, caffeine consumption, and alcohol consumption using appropriate sampling weights. The multivariable model 2 was adjusted for waist circumference in addition to model 1 using appropriate sampling weights. Abbreviations: NAFLD, nonalcoholic fatty liver disease; HR, hazard ratio; CI, confidence interval.

**Table S6.** Multivariable Hazards Ratio for Cardiovascular Mortality based on the Meeting Physical Activity Guideline among Individuals with NAFLD defined by US Fatty Liver Index.

|                                          | Age, sex-adjusted model |         | Multivariable model 1 |         | Multivariable model 2 |         |
|------------------------------------------|-------------------------|---------|-----------------------|---------|-----------------------|---------|
|                                          | HR (95% CI)             | p-value | HR (95% CI)           | p-value | HR (95% CI)           | p-value |
| Total physical activity                  |                         |         |                       |         |                       |         |
| <150 (min/wk)                            | 1                       |         | 1                     |         | 1                     |         |
| ≥150 (min/wk)                            | 0.51 (0.30–0.84)        | 0.009   | 0.53 (0.32–0.91)      | 0.021   | 0.55 (0.32–0.97)      | 0.038   |
| Leisure-time physical activity           |                         |         |                       |         |                       |         |
| <150 (min/wk)                            | 1                       |         | 1                     |         | 1                     |         |
| ≥150 (min/wk)                            | 0.36 (0.22–0.61)        | <0.001  | 0.36 (0.20–0.63)      | 0.001   | 0.37 (0.21–0.65)      | 0.001   |
| Occupation-related physical activity     |                         |         |                       |         |                       |         |
| <150 (min/wk)                            | 1                       |         | 1                     |         | 1                     |         |
| ≥150 (min/wk)                            | 0.87 (0.51–1.48)        | 0.594   | 0.94 (0.54–1.62)      | 0.812   | 0.97 (0.55–1.70)      | 0.914   |
| Transportation-related physical activity |                         |         |                       |         |                       |         |
| <150 (min/wk)                            | 1                       |         | 1                     |         | 1                     |         |
| ≥150 (min/wk)                            | 0.35 (0.15–0.81)        | 0.015   | 0.30 (0.12–0.73)      | 0.009   | 0.31 (0.13–0.77)      | 0.012   |

The multivariable model 1 was adjusted for age, sex, race/ethnicity, education level, marital status, economic status, smoking status, hypertension, diabetes, total cholesterol, total calorie intake, caffeine consumption, and alcohol consumption using appropriate sampling weights. The multivariable model 2 was adjusted for waist circumference in addition to model 1 using appropriate sampling weights. Abbreviations: NAFLD, nonalcoholic fatty liver disease; HR, hazard ratio; CI, confidence interval.

**Table S7.** Multivariable Hazards Ratio for Cardiovascular Mortality based on the Amount of Physical Activity among Individuals with NAFLD defined by US Fatty Liver Index.

| Age, sex-adjusted model                           |                  |          | Multivariable model 1 |         | Multivariable model 2 |         |
|---------------------------------------------------|------------------|----------|-----------------------|---------|-----------------------|---------|
|                                                   | HR (95% CI)      | p-value  | HR (95% CI)           | p-value | HR (95% CI)           | p-value |
| Total physical activity (min/wk)                  |                  |          |                       |         |                       |         |
| 0                                                 | 1                | 0.005 *  | 1                     | 0.016 * | 1                     | 0.030 * |
| 1–149                                             | 0.66 (0.24–1.26) | 0.206    | 0.72 (0.35–1.47)      | 0.364   | 0.75 (0.37–1.51)      | 0.410   |
| 150–299                                           | 0.46 (0.20–1.08) | 0.075    | 0.50 (0.20–1.28)      | 0.146   | 0.52 (0.20–1.37)      | 0.183   |
| 300–                                              | 0.45 (0.26–0.78) | 0.005    | 0.48 (0.26–0.88)      | 0.018   | 0.50 (0.27–0.94)      | 0.032   |
| Leisure-time physical activity (min/wk)           |                  |          |                       |         |                       |         |
| 0                                                 | 1                | <0.001 * | 1                     | 0.002 * | 1                     | 0.002 * |
| 1–149                                             | 0.89 (0.47–1.66) | 0.707    | 1.06 (0.53–2.14)      | 0.868   | 1.11 (0.55–2.22)      | 0.768   |
| 150–299                                           | 0.49 (0.26–0.92) | 0.027    | 0.48 (0.24–0.95)      | 0.035   | 0.49 (0.24–0.96)      | 0.038   |
| 300–                                              | 0.23 (0.10–0.54) | 0.001    | 0.24 (0.09–0.64)      | 0.005   | 0.25 (0.09–0.67)      | 0.007   |
| Occupation-related physical activity (min/wk)     |                  |          |                       |         |                       |         |
| 0                                                 | 1                | 0.389 *  | 1                     | 0.587 * | 1                     | 0.672 * |
| 1–149                                             | 0.43 (0.11–1.70) | 0.223    | 0.47 (0.12–1.85)      | 0.273   | 0.46 (0.12–1.81)      | 0.250   |
| 150–299                                           | 0.80 (0.27–2.34) | 0.673    | 0.94 (0.31–2.84)      | 0.911   | 0.97 (0.32–2.92)      | 0.960   |
| 300–                                              | 0.81 (0.47–1.39) | 0.446    | 0.86 (0.49–1.53)      | 0.614   | 0.89 (0.50–1.60)      | 0.701   |
| Transportation-related physical activity (min/wk) |                  |          |                       |         |                       |         |
| 0                                                 | 1                | 0.012 *  | 1                     | 0.010 * | 1                     | 0.013 * |
| 1–149                                             | 0.88 (0.45–1.74) | 0.714    | 0.91 (0.46–1.82)      | 0.795   | 0.95 (0.48–1.84)      | 0.868   |
| 150–299                                           | 0.52 (0.18–1.50) | 0.219    | 0.40 (0.12–1.28)      | 0.120   | 0.41 (0.12–1.37)      | 0.144   |
| 300–                                              | 0.21 (0.04–1.00) | 0.050    | 0.22 (0.04–1.06)      | 0.058   | 0.23 (0.05–1.11)      | 0.066   |

The multivariable model 1 was adjusted for age, sex, race/ethnicity, education level, marital status, economic status, smoking status, hypertension, diabetes, total cholesterol, total calorie intake, caffeine consumption, and alcohol consumption using appropriate sampling weights. The multivariable model 2 was adjusted for waist circumference in addition to model 1 using appropriate sampling weights. Abbreviations: NAFLD, nonalcoholic fatty liver disease; HR, hazard ratio; CI, confidence interval. \* *p*-values were analyzed using the test of the trend of hazards.

**Table S8.** Multivariable Hazards Ratio for All-Cause Mortality based on the Meeting Physical Activity Guidelines among Individuals without NAFLD defined by Hepatic Steatosis Index.

| Age, sex-adjusted model                  |                  |         | Multivariable model 1 |         | Multivariable model 2 |         |
|------------------------------------------|------------------|---------|-----------------------|---------|-----------------------|---------|
|                                          | HR (95% CI)      | p-value | HR (95% CI)           | p-value | HR (95% CI)           | p-value |
| Total physical activity                  |                  |         |                       |         |                       |         |
| <150 (min/wk)                            | 1                |         | 1                     |         | 1                     |         |
| ≥150 (min/wk)                            | 0.43 (0.36–0.50) | <0.001  | 0.48 (0.40–0.56)      | <0.001  | 0.50 (0.42–0.60)      | <0.001  |
| Leisure-time physical activity           |                  |         |                       |         |                       |         |
| <150 (min/wk)                            | 1                |         | 1                     |         | 1                     |         |
| ≥150 (min/wk)                            | 0.40 (0.32–0.48) | <0.001  | 0.46 (0.37–0.56)      | <0.001  | 0.47 (0.38–0.59)      | <0.001  |
| Occupation-related physical activity     |                  |         |                       |         |                       |         |
| <150 (min/wk)                            | 1                |         | 1                     |         | 1                     |         |
| ≥150 (min/wk)                            | 0.70 (0.60–0.83) | 0.013   | 0.75 (0.63–0.90)      | 0.002   | 0.79 (0.66–0.95)      | 0.013   |
| Transportation-related physical activity |                  |         |                       |         |                       |         |
| <150 (min/wk)                            | 1                |         | 1                     |         | 1                     |         |
| ≥150 (min/wk)                            | 0.71 (0.53–0.94) | 0.018   | 0.75 (0.56–1.00)      | 0.050   | 0.77 (0.58–1.03)      | 0.077   |

The multivariable model 1 was adjusted for age, sex, race/ethnicity, education level, married status, economic status, smoking status, hypertension, diabetes, total cholesterol, total calorie intake, caffeine consumption, and alcohol consumption using appropriate sampling weights. The

multivariable model 2 was adjusted for waist circumference in addition to model 1 using appropriate sampling weights. Abbreviations: NAFLD, nonalcoholic fatty liver disease; HR, hazard ratio; CI, confidence interval.

**Table S9.** Multivariable Hazards Ratio for All-Cause Mortality based on the Amount of Physical Activity among Individuals without NAFLD defined by Hepatic Steatosis Index.

| Age, sex-adjusted model                           |                  |          | Multivariable model 1 |          | Multivariable model 2 |          |
|---------------------------------------------------|------------------|----------|-----------------------|----------|-----------------------|----------|
|                                                   | HR (95% CI)      | p-value  | HR (95% CI)           | p-value  | HR (95% CI)           | p-value  |
| Total physical activity (min/wk)                  |                  |          |                       |          |                       |          |
| 0                                                 | 1                | <0.001 * | 1                     | <0.001 * | 1                     | <0.001 * |
| 1–149                                             | 0.65 (0.53–0.80) | <0.001   | 0.73 (0.57–0.94)      | 0.016    | 0.76 (0.59–0.98)      | 0.033    |
| 150–299                                           | 0.34 (0.27–0.44) | <0.001   | 0.41 (0.32–0.51)      | <0.001   | 0.43 (0.34–0.55)      | <0.001   |
| 300–                                              | 0.38 (0.31–0.46) | <0.001   | 0.43 (0.35–0.54)      | <0.001   | 0.46 (0.37–0.58)      | <0.001   |
| Leisure-time physical activity (min/wk)           |                  |          |                       |          |                       |          |
| 0                                                 | 1                | <0.001 * | 1                     | <0.001 * | 1                     | <0.001 * |
| 1–149                                             | 0.53 (0.44–0.65) | <0.001   | 0.61 (0.49–0.77)      | <0.001   | 0.64 (0.51–0.80)      | <0.001   |
| 150–299                                           | 0.35 (0.26–0.49) | <0.001   | 0.42 (0.31–0.59)      | <0.001   | 0.44 (0.32–0.61)      | <0.001   |
| 300–                                              | 0.34 (0.27–0.43) | <0.001   | 0.40 (0.30–0.53)      | <0.001   | 0.41 (0.31–0.55)      | <0.001   |
| Occupation-related physical activity (min/wk)     |                  |          |                       |          |                       |          |
| 0                                                 | 1                | <0.001 * | 1                     | 0.001 *  | 1                     | 0.005 *  |
| 1–149                                             | 0.60 (0.45–0.78) | <0.001   | 0.63 (0.47–0.83)      | 0.002    | 0.62 (0.47–0.81)      | 0.001    |
| 150–299                                           | 0.68 (0.45–1.02) | 0.060    | 0.76 (0.50–1.15)      | 0.194    | 0.81 (0.54–1.20)      | 0.294    |
| 300–                                              | 0.66 (0.54–0.82) | <0.001   | 0.71 (0.56–0.88)      | 0.003    | 0.74 (0.59–0.94)      | 0.012    |
| Transportation-related physical activity (min/wk) |                  |          |                       |          |                       |          |
| 0                                                 | 1                | 0.060 *  | 1                     | 0.197 *  | 1                     | 0.305 *  |
| 1–149                                             | 0.98 (0.74–1.31) | 0.914    | 1.07 (0.81–1.42)      | 0.619    | 1.12 (0.85–1.48)      | 0.420    |
| 150–299                                           | 0.51 (0.36–0.74) | <0.001   | 0.57 (0.38–0.83)      | 0.004    | 0.58 (0.40–0.85)      | 0.006    |
| 300–                                              | 0.86 (0.59–1.25) | 0.429    | 0.90 (0.61–1.34)      | 0.611    | 0.94 (0.63–1.39)      | 0.740    |

The multivariable model 1 was adjusted for age, sex, race/ethnicity, education level, marital status, economic status, smoking status, hypertension, diabetes, total cholesterol, total calorie intake, caffeine consumption, and alcohol consumption using appropriate sampling weights. The multivariable model 2 was adjusted for waist circumference in addition to model 1 using appropriate sampling weights. Abbreviations: NAFLD, nonalcoholic fatty liver disease; HR, hazard ratio; CI, confidence interval. \* *p*-values were analyzed using the test of the trend of hazards.

**Table S10.** Multivariable Hazards Ratio for Cardiovascular Mortality based on the Meeting Physical Activity Guideline among Individuals without NAFLD defined by Hepatic Steatosis Index.

| Age, sex-adjusted model                  |                  |         | Multivariable model 1 |         | Multivariable model 2 |         |
|------------------------------------------|------------------|---------|-----------------------|---------|-----------------------|---------|
|                                          | HR (95% CI)      | p-value | HR (95% CI)           | p-value | HR (95% CI)           | p-value |
| Total physical activity                  |                  |         |                       |         |                       |         |
| <150 (min/wk)                            | 1                |         | 1                     |         | 1                     |         |
| ≥150 (min/wk)                            | 0.47 (0.34–0.64) | <0.001  | 0.53 (0.38–0.73)      | <0.001  | 0.56 (0.40–0.79)      | 0.001   |
| Leisure-time physical activity           |                  |         |                       |         |                       |         |
| <150 (min/wk)                            | 1                |         | 1                     |         | 1                     |         |
| ≥150 (min/wk)                            | 0.35 (0.24–0.52) | <0.001  | 0.38 (0.25–0.57)      | <0.001  | 0.40 (0.27–0.59)      | <0.001  |
| Occupation-related physical activity     |                  |         |                       |         |                       |         |
| <150 (min/wk)                            | 1                |         | 1                     |         | 1                     |         |
| ≥150 (min/wk)                            | 0.72 (0.50–1.03) | 0.073   | 0.86 (0.58–1.26)      | 0.429   | 0.91 (0.61–1.35)      | 0.637   |
| Transportation-related physical activity |                  |         |                       |         |                       |         |
| <150 (min/wk)                            | 1                |         | 1                     |         | 1                     |         |
| ≥150 (min/wk)                            | 0.73 (0.43–1.23) | 0.230   | 0.71 (0.40–1.25)      | 0.233   | 0.74 (0.41–1.34)      | 0.310   |

The multivariable model 1 was adjusted for age, sex, race/ethnicity, education level, marital status, economic status, smoking status, hypertension, diabetes, total cholesterol, total calorie intake, caffeine consumption, and alcohol consumption using appropriate sampling weights. The multivariable model 2 was adjusted for waist circumference in addition to model 1 using appropriate sampling weights. Abbreviations: NAFLD, nonalcoholic fatty liver disease; HR, hazard ratio; CI, confidence interval.

**Table S11.** Multivariable Hazards Ratio for Cancer-related Mortality based on the Meeting Physical Activity Guideline among Individuals with NAFLD defined by Hepatic Steatosis Index.

|                                          | Age, sex-adjusted model |         | Multivariable model 1 |         | Multivariable model 2 |         |
|------------------------------------------|-------------------------|---------|-----------------------|---------|-----------------------|---------|
|                                          | HR (95% CI)             | p-value | HR (95% CI)           | p-value | HR (95% CI)           | p-value |
| Total physical activity                  |                         |         |                       |         |                       |         |
| <150 (min/wk)                            | 1                       |         | 1                     |         | 1                     |         |
| ≥150 (min/wk)                            | 0.99 (0.68–1.45)        | 0.977   | 1.15 (0.75–1.74)      | 0.520   | 1.16 (0.76–1.77)      | 0.485   |
| Leisure-time physical activity           |                         |         |                       |         |                       |         |
| <150 (min/wk)                            | 1                       |         | 1                     |         | 1                     |         |
| ≥150 (min/wk)                            | 1.02 (0.66–1.57)        | 0.926   | 1.13 (0.71–1.78)      | 0.602   | 1.16 (0.73–1.82)      | 0.532   |
| Occupation-related physical activity     |                         |         |                       |         |                       |         |
| <150 (min/wk)                            | 1                       |         | 1                     |         | 1                     |         |
| ≥150 (min/wk)                            | 0.93 (0.61–1.40)        | 0.708   | 0.98 (0.63–1.53)      | 0.938   | 0.98 (0.63–1.53)      | 0.943   |
| Transportation-related physical activity |                         |         |                       |         |                       |         |
| <150 (min/wk)                            | 1                       |         | 1                     |         | 1                     |         |
| ≥150 (min/wk)                            | 0.95 (0.52–1.72)        | 0.858   | 0.96 (0.51–1.81)      | 0.901   | 0.97 (0.51–1.82)      | 0.911   |

The multivariable model 1 was adjusted for age, sex, race/ethnicity, education level, marital status, economic status, smoking status, hypertension, diabetes, total cholesterol, total calorie intake, caffeine consumption, and alcohol consumption using appropriate sampling weights. The multivariable model 2 was adjusted for waist circumference in addition to model 1 using appropriate sampling weights. Abbreviations: NAFLD, nonalcoholic fatty liver disease; HR, hazard ratio; CI, confidence interval.

**Table S12.** Multivariable Hazards Ratio for Cancer-related Mortality based on the Meeting Physical Activity Guideline among Individuals without NAFLD defined by Hepatic Steatosis Index.

|                                          | Age, sex-adjusted model |         | Multivariable model 1 |         | Multivariable model 2 |         |
|------------------------------------------|-------------------------|---------|-----------------------|---------|-----------------------|---------|
|                                          | HR (95% CI)             | p-value | HR (95% CI)           | p-value | HR (95% CI)           | p-value |
| Total physical activity                  |                         |         |                       |         |                       |         |
| <150 (min/wk)                            | 1                       |         | 1                     |         | 1                     |         |
| ≥150 (min/wk)                            | 0.50 (0.36–0.69)        | <0.001  | 0.54 (0.38–0.78)      | 0.001   | 0.56 (0.39–0.80)      | 0.002   |
| Leisure-time physical activity           |                         |         |                       |         |                       |         |
| <150 (min/wk)                            | 1                       |         | 1                     |         | 1                     |         |
| ≥150 (min/wk)                            | 0.58 (0.39–0.85)        | 0.007   | 0.67 (0.43–1.02)      | 0.060   | 0.67 (0.44–1.04)      | 0.074   |
| Occupation-related physical activity     |                         |         |                       |         |                       |         |
| <150 (min/wk)                            | 1                       |         | 1                     |         | 1                     |         |
| ≥150 (min/wk)                            | 0.80 (0.54–1.16)        | 0.232   | 0.79 (0.52–1.21)      | 0.274   | 0.81 (0.53–1.25)      | 0.340   |
| Transportation-related physical activity |                         |         |                       |         |                       |         |
| <150 (min/wk)                            | 1                       |         | 1                     |         | 1                     |         |
| ≥150 (min/wk)                            | 0.66 (0.38–1.17)        | 0.154   | 0.70 (0.39–1.25)      | 0.220   | 0.70 (0.39–1.26)      | 0.233   |

The multivariable model 1 was adjusted for age, sex, race/ethnicity, education level, marital status, economic status, smoking status, hypertension, diabetes, total cholesterol, total calorie intake, caffeine consumption, and alcohol consumption using appropriate sampling weights. The multivariable model 2 was adjusted for waist circumference in addition to model 1 using appropriate sampling weights.

weights. Abbreviations: NAFLD, nonalcoholic fatty liver disease; HR, hazard ratio; CI, confidence interval.

**Table S13.** Multivariable Hazards Ratio for All-Cause and Cardiovascular Mortality based on the Amount of Sitting Time among Individuals with NAFLD defined by US Fatty Liver Index.

|                                  | Age, sex-adjusted model |                 | Multivariable model 1 |                 | Multivariable model 2 |                 |
|----------------------------------|-------------------------|-----------------|-----------------------|-----------------|-----------------------|-----------------|
|                                  | OR (95% CI)             | <i>p</i> -value | OR (95% CI)           | <i>p</i> -value | OR (95% CI)           | <i>p</i> -value |
| All-cause mortality              |                         |                 |                       |                 |                       |                 |
| Sitting time                     |                         |                 |                       |                 |                       |                 |
| Q1 (<4 hr)                       | 1                       | 0.012 *         | 1                     | 0.056 *         | 1                     | 0.081 *         |
| Q2 (4-<6 hr)                     | 1.01 (0.67–1.52)        | 0.967           | 1.03 (0.70–1.51)      | 0.872           | 1.02 (0.69–1.50)      | 0.915           |
| Q3 (6-<8 hr)                     | 0.92 (0.54–1.58)        | 0.765           | 0.92 (0.50–1.68)      | 0.773           | 0.90 (0.49–1.67)      | 0.743           |
| Q4 (≥8 hr)                       | 1.45 (1.05–2.01)        | 0.024           | 1.39 (0.98–1.98)      | 0.065           | 1.36 (0.95–1.96)      | 0.095           |
| Total physical activity (min/wk) |                         |                 |                       |                 |                       |                 |
| 0                                |                         |                 | 1                     | 0.019 *         | 1                     | 0.025 *         |
| 1–149                            |                         |                 | 0.64 (0.46–0.91)      | 0.014           | 0.66 (0.47–0.92)      | 0.016           |
| 150–299                          |                         |                 | 0.60 (0.34–1.06)      | 0.077           | 0.61 (0.35–1.07)      | 0.082           |
| 300–                             |                         |                 | 0.68 (0.50–0.92)      | 0.014           | 0.69 (0.51–0.94)      | 0.019           |
| Cardiovascular mortality         |                         |                 |                       |                 |                       |                 |
| Sitting time                     |                         |                 |                       |                 |                       |                 |
| Q1 (<4 hr)                       | 1                       | 0.008 *         | 1                     | 0.080 *         | 1                     | 0.119 *         |
| Q2 (4-<6 hr)                     | 0.83 (0.42–1.62)        | 0.582           | 0.78 (0.39–1.52)      | 0.457           | 0.76 (0.39–1.50)      | 0.427           |
| Q3 (6-<8 hr)                     | 0.72 (0.26–1.97)        | 0.514           | 0.68 (0.24–1.92)      | 0.460           | 0.66 (0.24–1.86)      | 0.428           |
| Q4 (≥8 hr)                       | 1.84 (1.07–3.13)        | 0.026           | 1.43 (0.86–2.39)      | 0.163           | 1.38 (0.82–2.33)      | 0.227           |
| Total physical activity (min/wk) |                         |                 |                       |                 |                       |                 |
| 0                                |                         |                 | 1                     | 0.033 *         | 1                     | 0.053 *         |
| 1–149                            |                         |                 | 0.73 (0.36–1.49)      | 0.379           | 0.75 (0.37–1.52)      | 0.420           |
| 150–299                          |                         |                 | 0.52 (0.20–1.34)      | 0.170           | 0.53 (0.20–1.43)      | 0.206           |
| 300–                             |                         |                 | 0.54 (0.30–0.97)      | 0.041           | 0.56 (0.30–1.03)      | 0.062           |

The multivariable model 1 was adjusted for age, sex, race/ethnicity, education level, marital status, economic status, smoking status, hypertension, diabetes, total cholesterol, total physical activity, total calorie intake, caffeine consumption, and alcohol consumption using appropriate sampling weights. The multivariable model 2 was adjusted for waist circumference in addition to model 1 using appropriate sampling weights. Abbreviations: NAFLD, nonalcoholic fatty liver disease; OR, odds ratio; CI, confidence interval. Weighted quartile 1, <4 hours; quartile 2, ≥4 hours to <6 hours; quartile 3, ≥6 hours to <8 hours; quartile 4, ≥8 hours. \* *p*-values were analyzed using the test of the trend of hazards.

**Table S14.** Multivariable Hazards Ratio for All-Cause and Cardiovascular Mortality based on the Amount of Sitting Time among Individuals without NAFLD defined by Hepatic Steatosis Index.

|                                  | Age, sex-adjusted model |                 | Multivariable model 1 |                 | Multivariable model 2 |                 |
|----------------------------------|-------------------------|-----------------|-----------------------|-----------------|-----------------------|-----------------|
|                                  | OR (95% CI)             | <i>p</i> -value | OR (95% CI)           | <i>p</i> -value | OR (95% CI)           | <i>p</i> -value |
| All-cause mortality              |                         |                 |                       |                 |                       |                 |
| Sitting time                     |                         |                 |                       |                 |                       |                 |
| Q1 (<4 hr)                       | 1                       | <0.001 *        | 1                     | <0.001 *        | 1                     | 0.001 *         |
| Q2 (4-<6 hr)                     | 1.11 (0.87–1.41)        | 0.393           | 1.10 (0.90–1.35)      | 0.361           | 1.10 (0.89–1.36)      | 0.364           |
| Q3 (6-<8 hr)                     | 1.20 (0.94–1.52)        | 0.137           | 1.16 (0.92–1.47)      | 0.216           | 1.18 (0.93–1.50)      | 0.160           |
| Q4 (≥8 hr)                       | 1.81 (1.49–2.19)        | <0.001          | 1.51 (1.23–1.86)      | <0.001          | 1.43 (1.16–1.77)      | 0.001           |
| Total physical activity (min/wk) |                         |                 |                       |                 |                       |                 |
| 0                                |                         |                 | 1                     | <0.001 *        | 1                     | <0.001 *        |
| 1–149                            |                         |                 | 0.76 (0.59–0.97)      | 0.030           | 0.78 (0.61–1.01)      | 0.056           |
| 150–299                          |                         |                 | 0.42 (0.33–0.53)      | <0.001          | 0.44 (0.34–0.57)      | <0.001          |
| 300–                             |                         |                 | 0.47 (0.37–0.59)      | <0.001          | 0.49 (0.39–0.62)      | <0.001          |

| Cardiovascular mortality         |                  |          |                  |          |                  |         |
|----------------------------------|------------------|----------|------------------|----------|------------------|---------|
| Sitting time                     |                  |          |                  |          |                  |         |
| Q1 (<4 hr)                       | 1                | <0.001 * | 1                | 0.011 *  | 1                | 0.019 * |
| Q2 (4-<6 hr)                     | 1.30 (0.82–2.05) | 0.249    | 1.34 (0.81–2.21) | 0.250    | 1.30 (0.78–2.16) | 0.309   |
| Q3 (6-<8 hr)                     | 1.31 (0.84–2.05) | 0.232    | 1.25 (0.75–2.09) | 0.380    | 1.27 (0.75–2.13) | 0.366   |
| Q4 (≥8 hr)                       | 2.47 (1.56–3.90) | <0.001   | 1.91 (1.15–3.15) | 0.013    | 1.77 (1.08–2.88) | 0.023   |
| Total physical activity (min/wk) |                  |          |                  |          |                  |         |
| 0                                |                  |          | 1                | <0.001 * | 1                | 0.001 * |
| 1–149                            |                  |          | 0.69 (0.41–1.16) | 0.161    | 0.71 (0.41–1.22) | 0.210   |
| 150–299                          |                  |          | 0.56 (0.38–0.82) | 0.003    | 0.59 (0.40–0.87) | 0.009   |
| 300–                             |                  |          | 0.49 (0.33–0.72) | <0.001   | 0.51 (0.34–0.77) | 0.002   |

The multivariable model 1 was adjusted for age, sex, race/ethnicity, education level, marital status, economic status, smoking status, hypertension, diabetes, total cholesterol, total physical activity, total calorie intake, caffeine consumption, and alcohol consumption using appropriate sampling weights. The multivariable model 2 was adjusted for waist circumference in addition to model 1 using appropriate sampling weights. Abbreviations: NAFLD, nonalcoholic fatty liver disease; OR, odds ratio; CI, confidence interval. Weighted quartile 1, <4 hours; quartile 2, ≥4 hours to <6 hours; quartile 3, ≥6 hours to <8 hours; quartile 4, ≥8 hours. \* *p*-values were analyzed using the test of the trend of hazards.
